# Supplementary material
Source: Springer Nature journal article supplement (https://www.springermedizin.de/resource/supplementary/12882_2011_258_MOESM1_ESM.pdf/9453642)
Supplement: MOESM1 [file 9453642]

3,075 CKD Stage 3-5 in  
Henry Ford Health System  
between Jan. 1, 2004 and June 30, 2008

1,359 patients with  
chronic anemia

Patient exclusions:

162 with <12 months of data prior to anemia index date

379 cancer

242 with ESRD or dialysis

166 with liver transplant, acute bleeding, sickle cell or aplastic anemia, or  
trauma from 6 months prior to and until end of follow-up

36 Received dialysis /ESRD or transplant within 6 months prior

374 Eligible  
patients

303 patients with 2<sup>nd</sup> Hb < 10 g/dL  
83 patients with ESA after 1<sup>st</sup> Hb < 10 g/dL  
13 patients with transfusion after 1<sup>st</sup> Hb <10 g/dL
